# Supplementary material
Source: Royal Society of Chemistry journal article supplement (doi:10.1039/d5me00220f)

# **Supporting Information for Reconstruction of Realistic Kerogen's Molecular Models in Shale Oil and Gas Reservoirs: The Physicochemical Inversion Method**

Mingzhu Xu,<sup>†,‡,¶</sup> Xiaohe Wang,<sup>†,‡,¶</sup> Xianfu Huang,<sup>\*,†,‡</sup> Quanzi Yuan,<sup>\*,†,‡</sup> and Ya-Pu  
Zhao<sup>\*,†,‡</sup>

<sup>†</sup>State Key Laboratory of Nonlinear Mechanics, Institute of Mechanics, Chinese Academy of  
Sciences, Beijing 100190, China

<sup>‡</sup>School of Engineering Science, University of Chinese Academy of Sciences, Beijing 100190,  
China

<sup>¶</sup>These authors are co-first authors.

E-mail: [huangxf@imech.ac.cn](mailto:huangxf@imech.ac.cn); [yuanquanzi@lnm.imech.ac.cn](mailto:yuanquanzi@lnm.imech.ac.cn); [yzhao@imech.ac.cn](mailto:yzhao@imech.ac.cn)

This Supporting Information document provides additional tables that support and extend the analysis presented in the main manuscript. It is organized into three parts: the detailed identification of pyrolysates obtained at different pyrolysis temperatures, the comparison of the computational time required for DFT calculations, and the complete set of molecular structures reconstructed by PIM.

## Part 1. The detailed identification of pyrolysate with different pyrolysis temperatures.

Table S1. The detailed identification of pyrolysate with the pyrolysis temperature at 650°C.

| R.T. (min) | Molecular fragment                                           | Percent of peak area |
|------------|--------------------------------------------------------------|----------------------|
| 1.64       | Acetonitrile                                                 | 2.28                 |
| 1.74       | Ethanolamine                                                 | 0.82                 |
| 11.13      | 4-Hydroxyimino-but-2-enoic acid, ethyl ester                 | 0.89                 |
| 31.44      | Tetradecane                                                  | 0.49                 |
| 35.54      | Pentadecane                                                  | 0.53                 |
| 39.42      | Hexadecane                                                   | 0.44                 |
| 43.11      | Heptadecane                                                  | 0.59                 |
| 45.29      | Tetradecanoic acid                                           | 0.68                 |
| 46.61      | Eicosane                                                     | 0.41                 |
| 49.26      | 1-Hexadecanol                                                | 0.79                 |
| 49.95      | Heneicosane                                                  | 0.78                 |
| 52.10      | n-Hexadecanoic acid                                          | 9.53                 |
| 53.15      | Eicosane                                                     | 0.4                  |
| 55.68      | n-Heptadecanol-1                                             | 1.4                  |
| 56.21      | Heneicosane                                                  | 0.42                 |
| 58.30      | Octadecanoic acid                                            | 20.11                |
| 59.14      | Eicosane                                                     | 0.44                 |
| 59.32      | 4-Amino-9-fluorenone                                         | 0.56                 |
| 61.95      | Eicosane                                                     | 1.35                 |
| 62.30      | Perylene                                                     | 0.97                 |
| 62.43      | Benzo[k]fluoranthene                                         | 0.99                 |
| 64.55      | 2-(2,4,6-Cycloheptatrienylidene)-1,3-indandione              | 1.27                 |
| 64.66      | Eicosane                                                     | 0.94                 |
| 65.31      | 2-(2,4,6-Cycloheptatrienylidene)-1,3-indandione              | 1.59                 |
| 66.49      | 1-Hydroxypyrene                                              | 1.28                 |
| 67.27      | Heneicosane                                                  | 1.14                 |
| 67.39      | l-(+)-Ascorbic acid 2,6-dihexadecanoate, Isopropyl palmitate | 5.36                 |
| 67.87      | Benzo[b]naphtho[2,3-d]thiophene, 6-methyl-                   | 1.05                 |
| 68.08      | Epibuphanamine                                               | 1.3                  |
| 69.67      | Benzo[c]phenanthrene, 5-methyl-                              | 1.15                 |
| 69.77      | Heptadecane, 9-octyl-                                        | 2.21                 |
| 69.98      | Benz[a]anthracene, 9-methyl-                                 | 0.73                 |
| 70.19      | 11H-Indeno[1,2-b]quinoline, 2,6-dimethyl-                    | 0.74                 |
| 70.92      | Benzo[b]naphtho[2,3-d]thiophene, 6,8-dimethyl-               | 0.65                 |

|       |                                                              |      |
|-------|--------------------------------------------------------------|------|
| 72.20 | Eicosane                                                     | 2.42 |
| 73.34 | Benzo[j]fluoranthene                                         | 6.97 |
| 74.11 | Benzo(a)pyren-7-ol                                           | 0.55 |
| 74.53 | Tetratriacontane                                             | 2.15 |
| 74.86 | Dinaphtho[1,2-b:1',2'-d]furan, Dinaphtho[2,1-b:1',2'-d]furan | 1.64 |
| 75.03 | Benzo[e]pyrene                                               | 1.87 |
| 75.19 | Benzo(a)pyrene 4,5-oxide                                     | 0.7  |
| 75.33 | Benzo[k]fluoranthene                                         | 2.25 |
| 86.80 | Tetratriacontane                                             | 2.03 |

Table S2. The detailed identification of pyrolysate with the pyrolysis temperature at 800°C.

| R.T. (min) | Molecular fragment                       | Percent of peak area |
|------------|------------------------------------------|----------------------|
| 1.77       | Ala-Gly                                  | 4.67                 |
| 2.27       | Cyclopropane, 1-ethyl-2-methyl-, cis-    | 2.55                 |
| 2.75       | Benzene                                  | 2.35                 |
| 4.13       | Toluene                                  | 3.29                 |
| 7.14       | o-Xylene                                 | 1.35                 |
| 8.03       | p-Xylene                                 | 1.63                 |
| 12.5       | Benzene, 1-ethyl-3-methyl-               | 1.19                 |
| 26.56      | Naphthalene, 2-methyl-                   | 0.57                 |
| 31.43      | Tetradecane                              | 0.82                 |
| 35.52      | Pentadecane                              | 0.69                 |
| 39.4       | Hexadecane                               | 0.59                 |
| 43.08      | Heptadecane                              | 0.74                 |
| 46.59      | Eicosane                                 | 0.59                 |
| 49.24      | 2-((2-Ethoxyethoxy)carbonyl)benzoic acid | 0.66                 |
| 49.93      | Heneicosane                              | 0.64                 |
| 52.02      | n-Hexadecanoic acid                      | 9.96                 |
| 53.12      | Eicosane                                 | 0.55                 |
| 56.18      | Heneicosane                              | 0.55                 |
| 57.12      | 9,12-Octadecadienoic acid (Z,Z)-         | 0.82                 |
| 57.29      | trans-13-Octadecenoic acid               | 1.13                 |
| 58.21      | Octadecanoic acid                        | 25.44                |
| 58.55      | Hexadecanamide                           | 1.66                 |
| 59.12      | Eicosane                                 | 0.81                 |

|       |                        |      |
|-------|------------------------|------|
| 61.93 | Eicosane               | 0.71 |
| 63.5  | 9-Octadecenamide, (Z)- | 2.75 |
| 64.63 | Tetracosane            | 0.82 |
| 67.23 | Eicosane               | 1.39 |
| 69.74 | Heneicosane            | 1.85 |
| 72.16 | Tetratriacontane       | 2.28 |
| 73.25 | Benzo[k]fluoranthene   | 1.58 |
| 74.51 | Tetratriacontane       | 2.29 |
| 76.77 | 2-methylhexacosane     | 0.85 |
| 81.07 | Tetratetracontane      | 1.72 |

Table S3. The detailed identification of pyrolysate with the pyrolysis temperature at 950°C.

| R.T. (min) | Molecular fragment                       | Percent of peak area |
|------------|------------------------------------------|----------------------|
| 1.92       | Methylenecyclopropane                    | 5.47                 |
| 2.18       | Glycine                                  | 5.38                 |
| 2.32       | 1-Hexene                                 | 1.6                  |
| 2.63       | 1,4-Cyclohexadiene                       | 0.92                 |
| 2.80       | Benzene                                  | 3.79                 |
| 4.20       | Toluene                                  | 3.82                 |
| 7.18       | Benzene, 1,3-dimethyl-                   | 1.32                 |
| 8.00       | Styrene                                  | 0.98                 |
| 8.08       | o-Xylene                                 | 0.74                 |
| 12.52      | Mesitylene                               | 1.02                 |
| 21.50      | Naphthalene                              | 0.67                 |
| 26.57      | Naphthalene, 1-methyl-                   | 0.64                 |
| 43.08      | Heptadecane                              | 0.54                 |
| 49.25      | 2-((2-Chloroethoxy)carbonyl)benzoic acid | 0.63                 |
| 52.05      | n-Hexadecanoic acid                      | 11.83                |
| 58.21      | Octadecanoic acid                        | 25.68                |
| 58.55      | Hexadecanamide                           | 3.31                 |
| 61.94      | Heneicosane                              | 0.84                 |
| 63.52      | 9-Octadecenamide, (Z)-                   | 5.78                 |
| 64.64      | Tetracosane                              | 0.92                 |
| 67.25      | Eicosane                                 | 1.88                 |

|       |                      |      |
|-------|----------------------|------|
| 69.76 | Tetracosane          | 2.7  |
| 72.18 | Tetratriacontane     | 3.21 |
| 73.27 | Benzo[k]fluoranthene | 1.52 |
| 74.52 | Tetratriacontane     | 2.68 |
| 76.78 | Tetratriacontane     | 1.02 |

## Part 2. The comparison of the computational time required for DFT calculations

Table S4 Single point energy and time comparison for various methods and sites of Figure 3.

|   | B3LYP/6-31G(d) |       | B3LYP-D3/6-311+G(d, p) |         |
|---|----------------|-------|------------------------|---------|
|   | BDE (a.u.)     | Time  | BDE (a.u.)             | Time    |
| 1 | 0.1183         | 46min | 0.1210                 | 612min  |
| 2 | 0.1696         | 57min | 0.1705                 | 687min  |
| 3 | 0.1657         | 74min | 0.1672                 | 1263min |

**Part 3. The complete set of molecular structures reconstructed by PIM.**

No.1

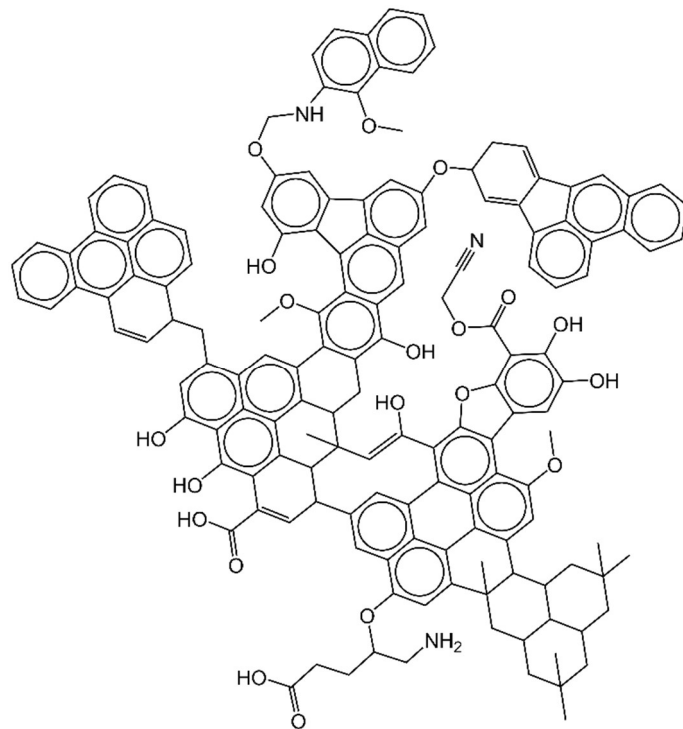

No.2

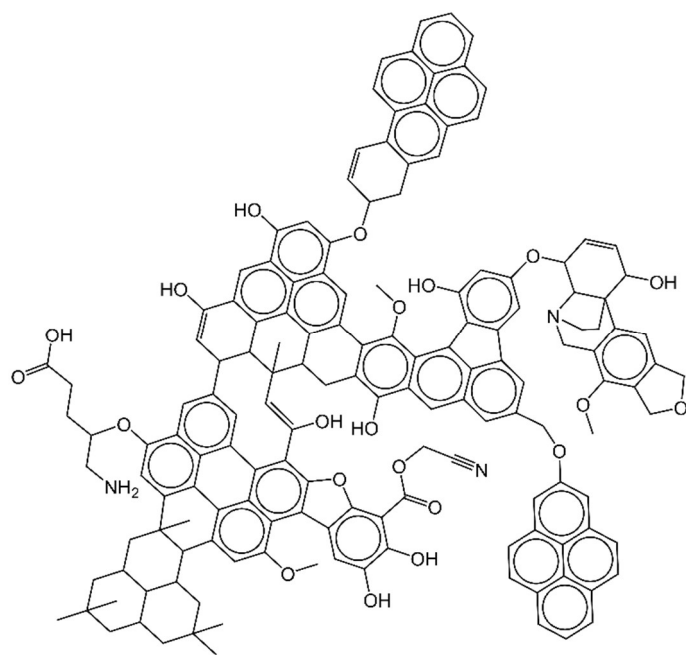

No.3

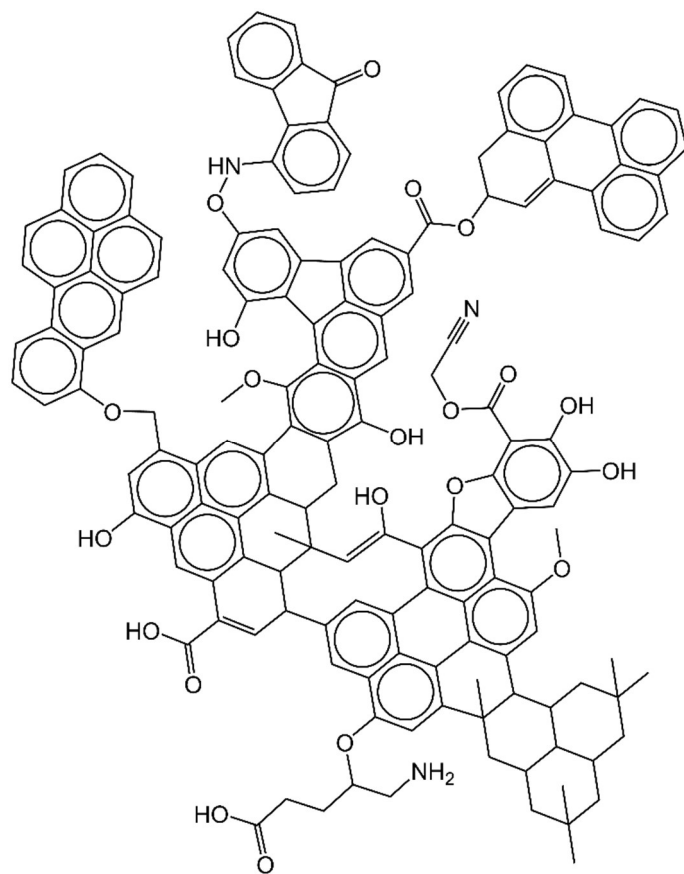

No.4

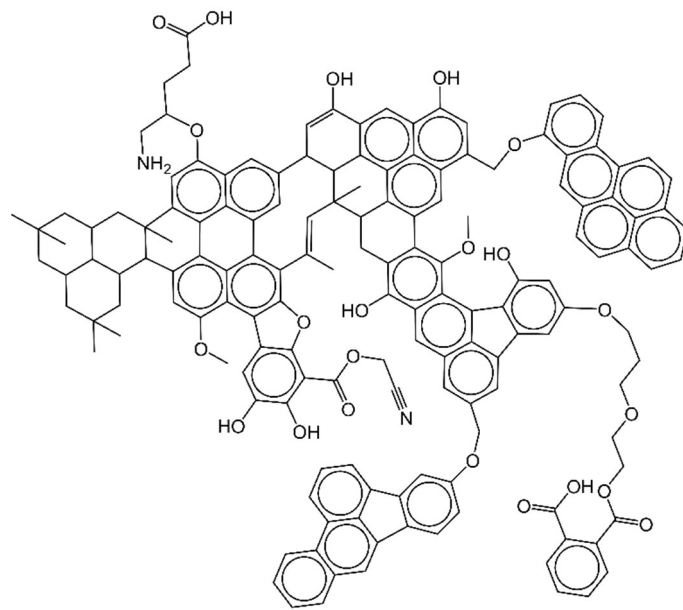

No.5

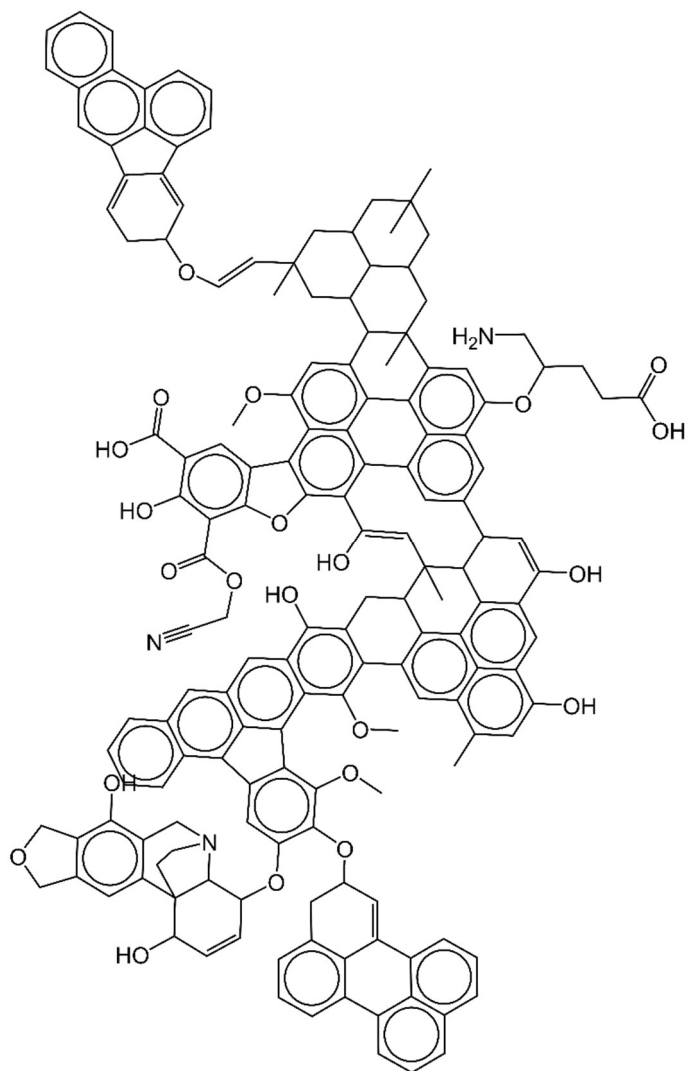

No.6

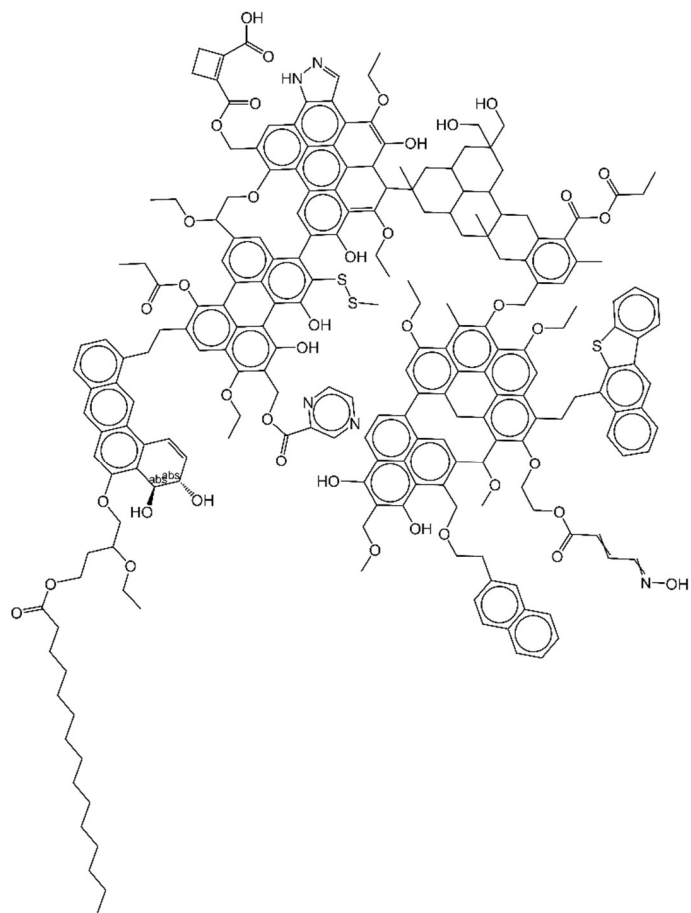

No.7

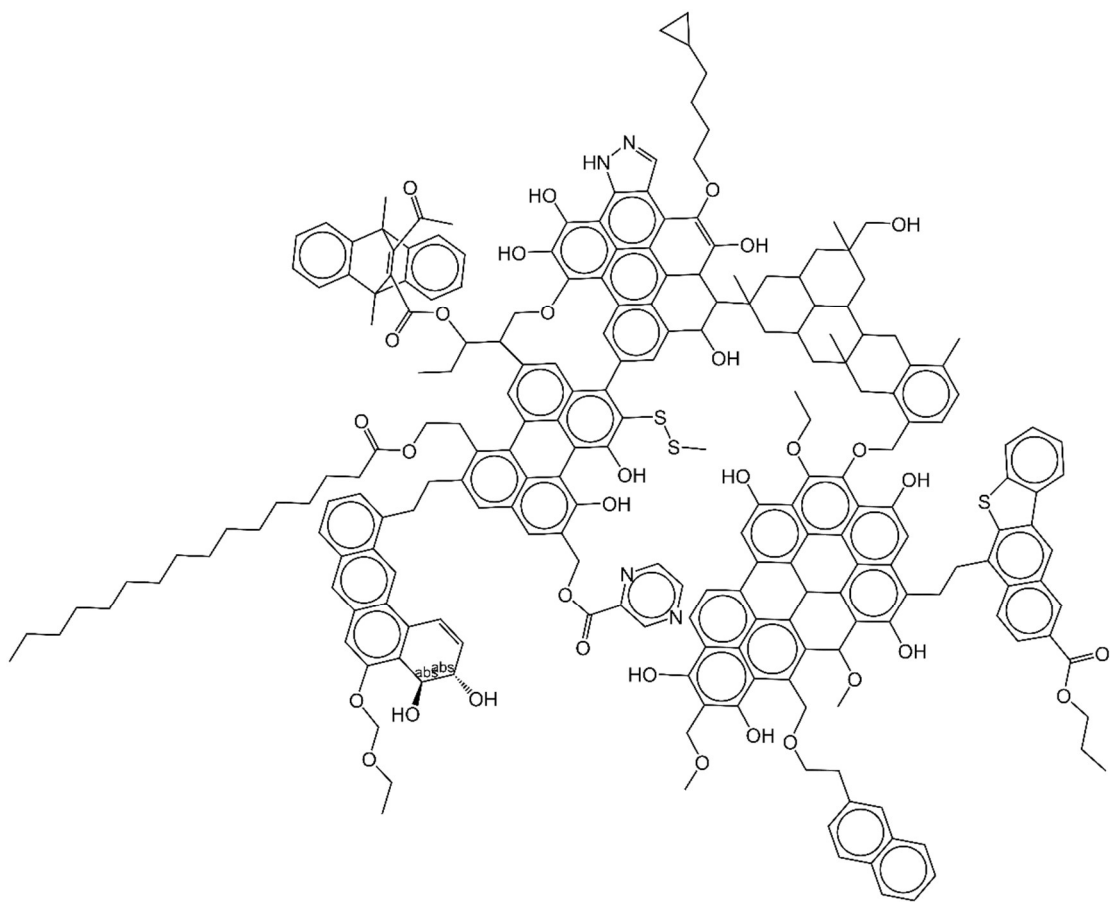

No.8

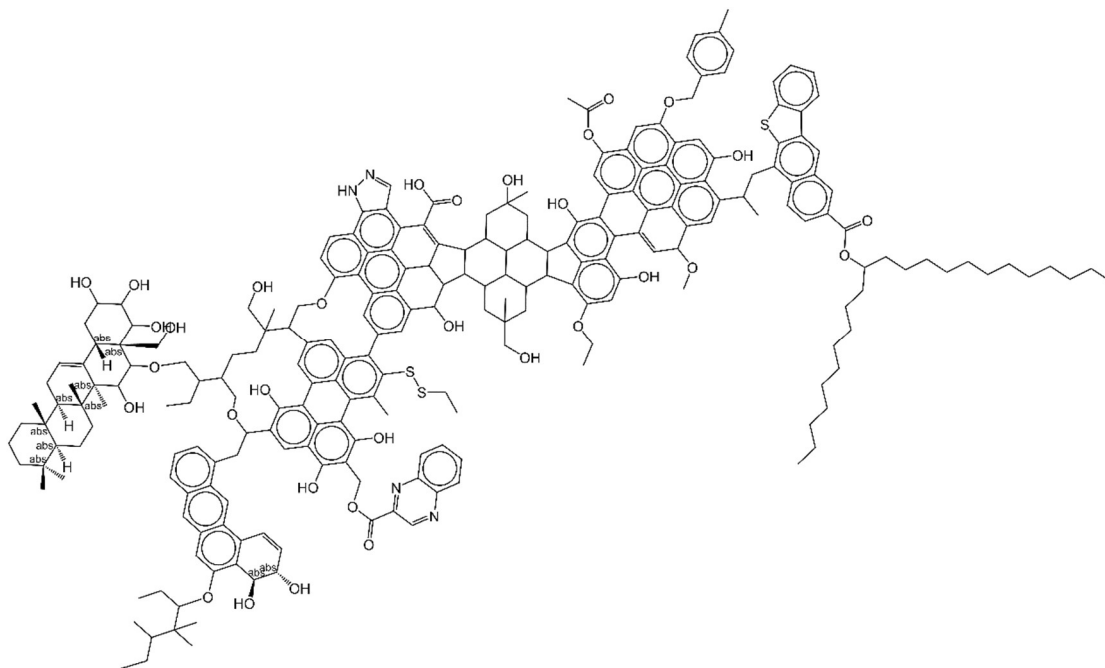

No.9

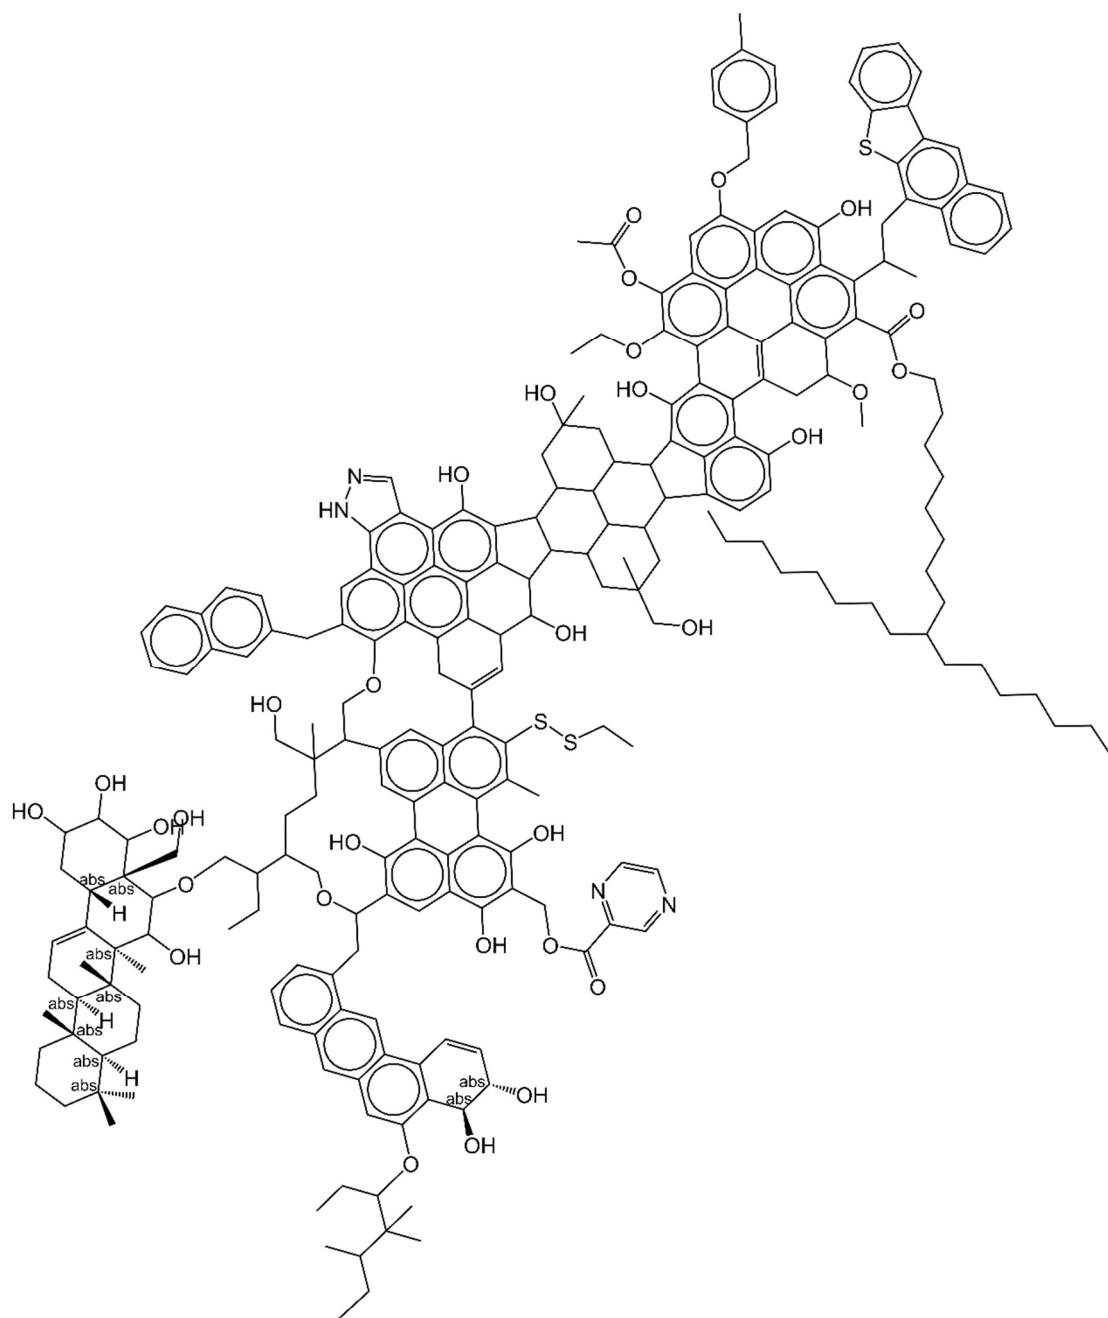

No.10

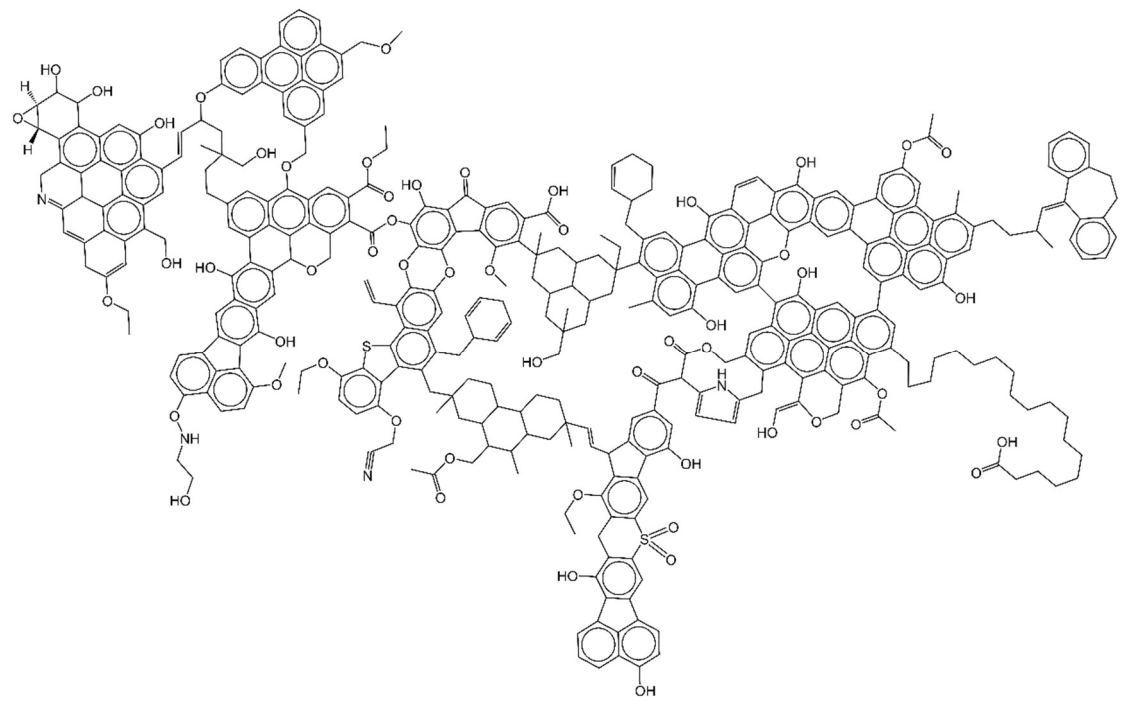

No.11

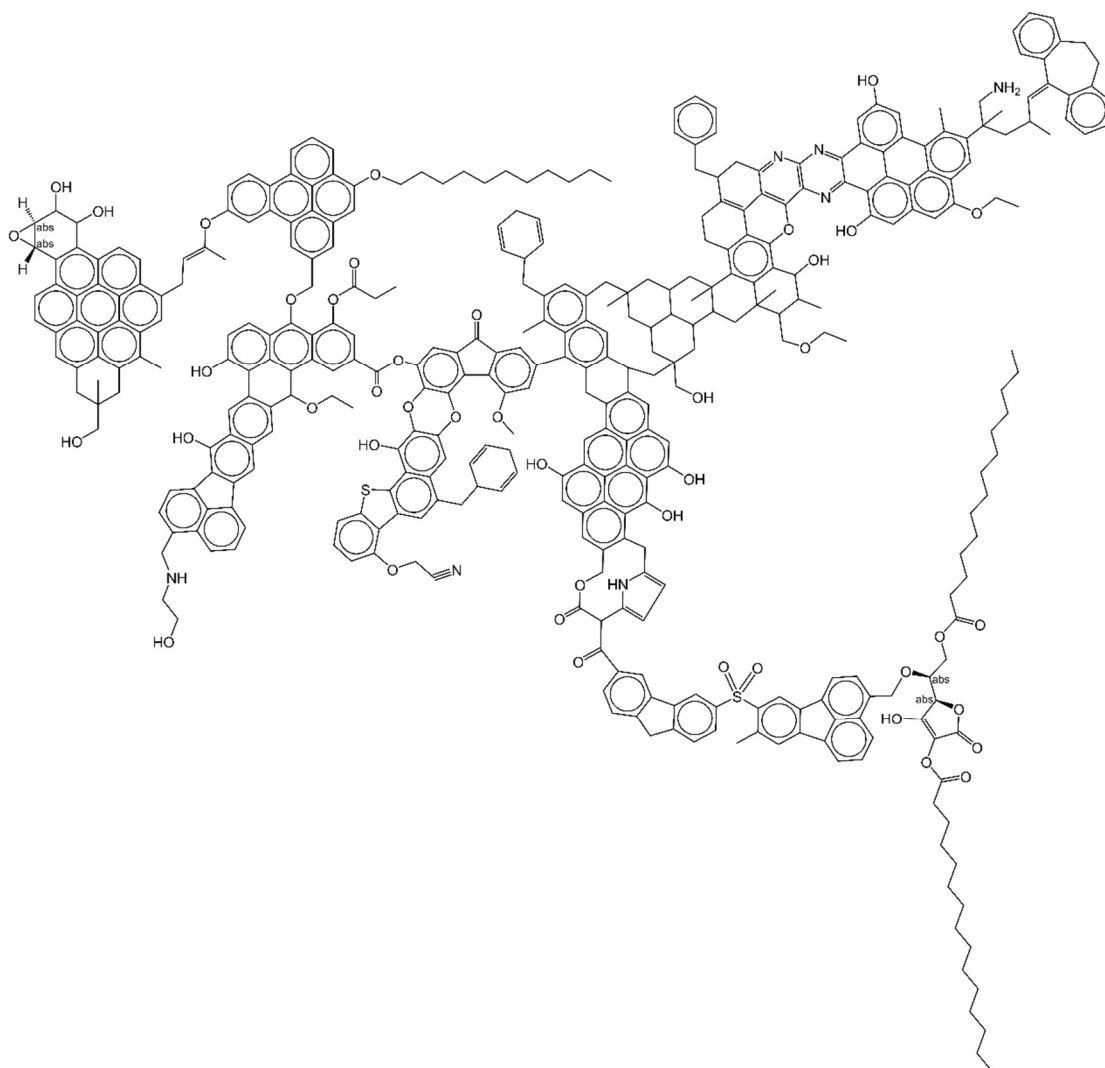

No.12

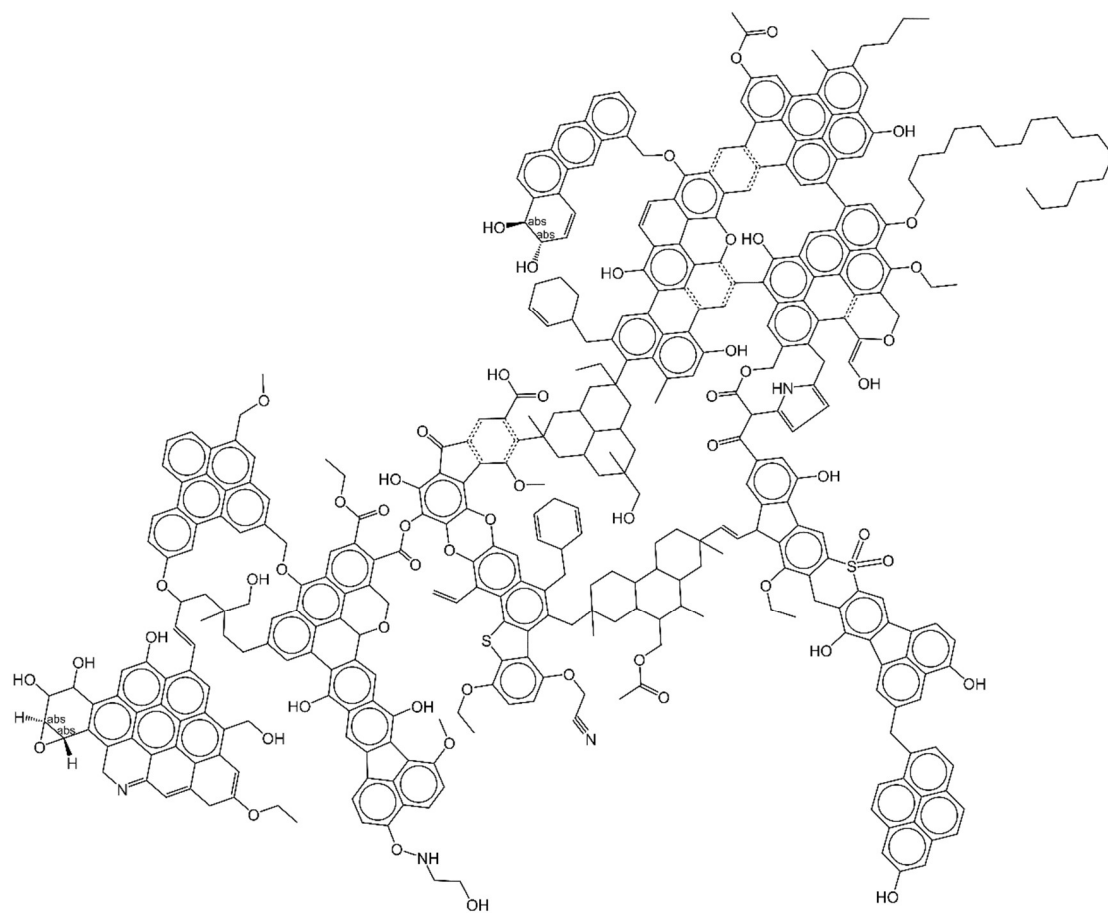

No.13

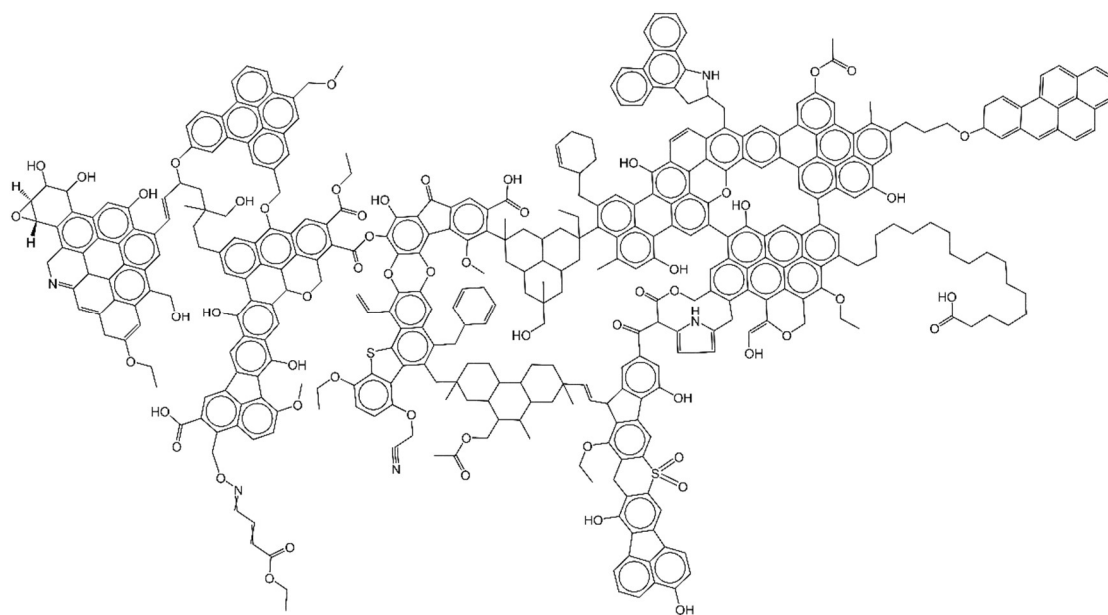

No.14

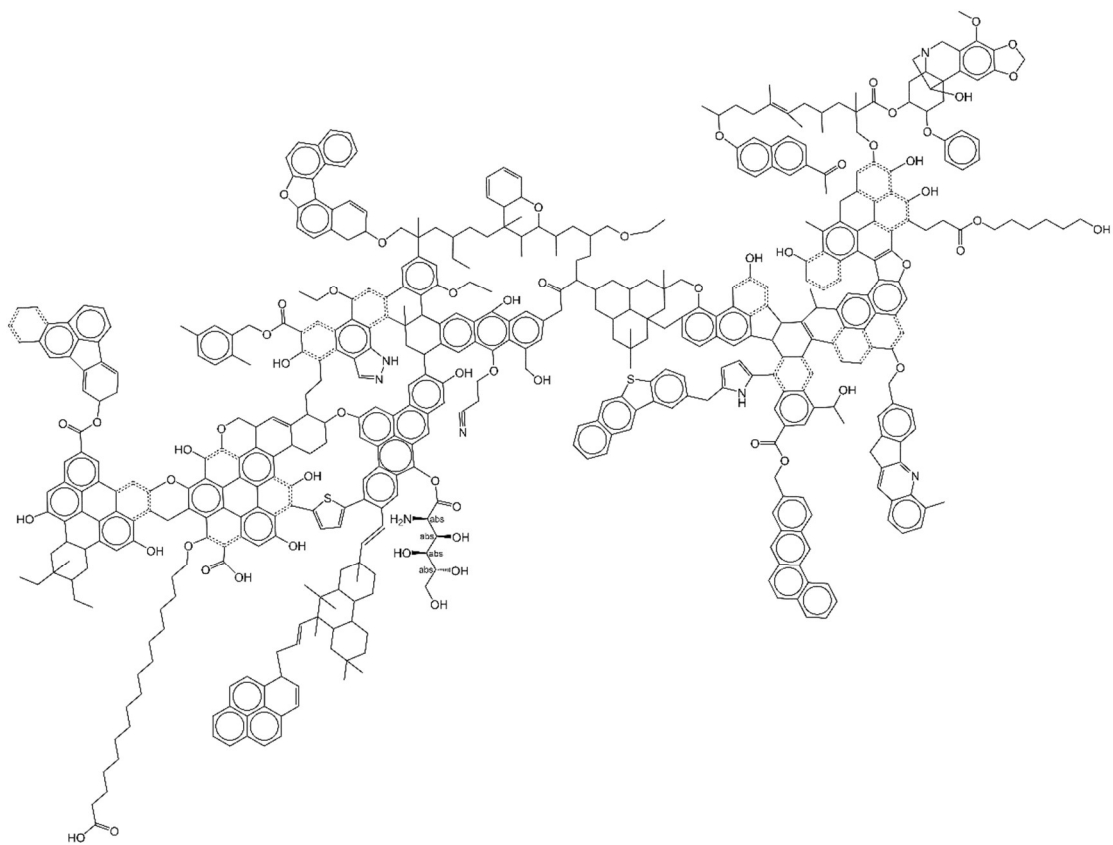

No.15

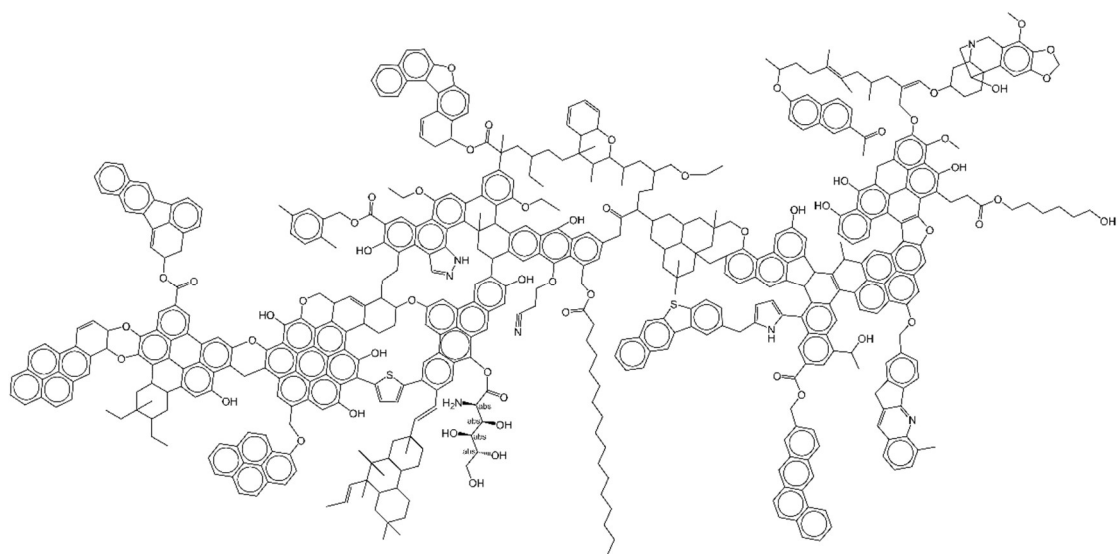

Supplement: d5me00220f1.pdf [file d5me00220f1.pdf]
